# Supplementary material
Source: Research Square preprint supplement (doi:10.21203/rs.3.rs-9629890/v1)
Supplement: Supplementary file 1 [file b44204ec17086b01c0ceb226.doc]

**References**

Alahakoon, M. U. I., and S. N. Jehan. 2020. “Efficiency of Public Service Delivery—A Post-ICT Deployment Analysis.” *Economies* 8(4). doi: 10.3390/ECONOMIES8040097.

Alao, Abiodun, and Roelien Brink. 2022. “Strategies for Using ICT Skills in Educational Systems for Sustainable Youth Employability in South Africa.” *Sustainability (Switzerland)* 14(24). doi: 10.3390/su142416513.

Alexopoulou, S. 2024. “Paradigm Shift: Exploring the Impact of Digital Technologies on the Welfare State through a Systematic Literature Review.” *Social Policy and Administration*. doi: 10.1111/spol.13054.

Allmann, Kira, and Roxana Radu. 2023. “Digital Footprints as Barriers to Accessing E-Government Services.” *Global Policy* 14(1):84–94. doi: 10.1111/1758-5899.13140.

Androniceanu, Armenia. 2023. “The New Trends of Digital Transformation and Artificial Intelligence in Public Administration.” *Administratie Si Management Public* 2023(40):147–55. doi: 10.24818/amp/2023.40-09.

Asif, Muhammad, Liu Yang, and Muhammad Hashim. 2024. “The Role of Digital Transformation, Corporate Culture, and Leadership in Enhancing Corporate Sustainable Performance in the Manufacturing Sector of China.” *Sustainability (Switzerland)*  16(7). doi: 10.3390/su16072651.

Assefa, S., A. Rorissa, and D. Alemneh. 2021. “Digital Readiness Assessment of Countries in Africa: A Case Study Research.” *Proceedings of the Association for Information Science and Technology* 58(1):400–404. doi: 10.1002/pra2.467.

Astuty, Eriana, Ivan Diryana Sudirman, and Rudy Aryanto. 2024. “Sustainable Resilience Strategy: Unleash the Micro-Businesses’s Potential in the Digitalization and Sustainability Era.” *Cogent Business and Management* 11(1). doi: 10.1080/23311975.2024.2313672.

Bokayev, B., Z. Davletbayeva, A. Amirova, Z. Rysbekova, Z. Torebekova, and G. Jussupova. 2021. “Transforming E-Government in Kazakhstan: A Citizen-Centric Approach.” *Innovation Journal* 26(1):1–21.

Brunetti, Federico, Dominik T. Matt, Angelo Bonfanti, Alberto De Longhi, Giulio Pedrini, and Guido Orzes. 2020. “Digital Transformation Challenges: Strategies Emerging from a Multi-Stakeholder Approach.” *TQM Journal* 32(4):697–724. doi: 10.1108/TQM-12-2019-0309.

Cruz-Martínez, Gustavo A., Alejandro Vega-Muñoz, Guido Salazar-Sepúlveda, and Pablo Toledo-Aceituno. 2024. “Analysis of Studies on Digital Strategy: Bibliometric Research of Three Decades.” *Sustainability (Switzerland)* 16(20). doi: 10.3390/su16208789.

Delgado, A. T. 2019. “Is the Public Sector Interpreting Market Ready for Digital Transformation?” *Revista Tradumatica* (17):88–93. doi: 10.5565/rev/tradumatica.236.

Dobrolyubova, E. 2021. “Measuring Outcomes of Digital Transformation in Public Administration: Literature Review and Possible Steps Forward.” *NISPAcee Journal of Public Administration and Policy* 14(1):61–86. doi: 10.2478/nispa-2021-0003.

Egorova, Maria A., Vladislav V. Grib, Lela Chkhutiashvili, and Vitaliy Slepak. 2021. “TRANSFORMATION of the PUBLIC ADMINISTRATION SYSTEM in the DIGITAL ECONOMY.” *Acta Scientiarum Polonorum, Administratio Locorum* 20(4):295–303. doi: 10.31648/ASPAL.6792.

Engvall, Tove Sofia, and Leif Skiftenes Flak. 2022. “The State of Information Infrastructure for Global Climate Governance.” *Transforming Government: People, Process and Policy* 16(4):436–48. doi: 10.1108/TG-05-2022-0064.

Erkut, Burak. 2020. “From Digital Government to Digital Governance: Are We There Yet?” *Sustainability (Switzerland)* 12(3). doi: 10.3390/su12030860.

Fernandes, Silvia. 2021. “Which Way to Cope with Covid-19 Challenges? Contributions of the Iot for Smart City Projects.” *Big Data and Cognitive Computing* 5(2). doi: 10.3390/bdcc5020026.

Gebrihet, Hafte Gebreselassie, and Pregala Pillay. 2021. “Emerging Challenges and Prospects of Digital Transformation and Stakeholders Integration in Urban Land Administration in Ethiopia.” *Global Journal of Emerging Market Economies* 13(3). doi: 10.1177/09749101211034097.

Harvey, Morgan, David P. Hastings, and Gobinda Chowdhury. 2023. “Understanding the Costs and Challenges of the Digital Divide through UK Council Services.” *Journal of Information Science* 49(5):1153–67. doi: 10.1177/01655515211040664.

Irani, Zahir, Raul M. Abril, Vishanth Weerakkody, Amizan Omar, and Uthayasankar Sivarajah. 2023. “The Impact of Legacy Systems on Digital Transformation in European Public Administration: Lesson Learned from a Multi Case Analysis.” *Government Information Quarterly* 40(1). doi: 10.1016/j.giq.2022.101784.

Isik, Leman, Christina Nilsson, Johan Magnusson, and Dina Koutsikouri. 2024. “Benefits Realization in Digital Transformation: The Translation from Policy to Practice in Health Care.” *Transforming Government: People, Process and Policy* 18(2):303–17. doi: 10.1108/TG-11-2023-0177.

Kehl, Christoph, Steffen Albrecht, Pauline Riousset, and Arnold Sauter. 2021. “Goodbye Expert-Based Policy Advice? Challenges in Advising Governmental Institutions in Times of Transformation.” *Sustainability (Switzerland)* 13(23). doi: 10.3390/su132313442.

Kemal, Atika Ahmad, and Mahmood Hussain Shah. 2024. “Digital Innovation in Social Cash Organizations – the Effects of the Institutional Interactions for Transforming Organizational Practices.” *Information Technology and People* 37(5):2092–2126. doi: 10.1108/ITP-02-2023-0176.

Kristensen, Kenneth. 2023. “Why Digitalization Is NOT on the Local Political Agenda-Findings From Danish Local Governments.” doi: 10.58235/sjp.

Leite, Higor, Ian R. Hodgkinson, and Ana V. L. Volochtchuk. 2023. “New Development: Digital Social Care—the ‘High-Tech and Low-Touch’ Transformation in Public Services.” *Public Money and Management* 43(2):183–86. doi: 10.1080/09540962.2022.2140897.

Li, Haili, and Genia Kostka. 2024. “Navigating the Digital Age: The Gray Digital Divide and Digital Inclusion in China.” *Media, Culture and Society*. doi: 10.1177/01634437241229382.

Loglo, F. S. 2024. “Towards Digital Transformation of Selected Ghanaian Public Universities: Leadership Enablers, Challenges, and Opportunities.” *Open Praxis* 16(3):374–95. doi: 10.55982/openpraxis.16.3.700.

Manda, M. I. 2021. “Power, Politics, and the Institutionalisation of Information Systems for Promoting Digital Transformation in the Public Sector: A Case of the South African’s Government Digital Transformation Journey.” *Information Polity* 27(3):311–29. doi: 10.3233/IP-200233.

McDermott, Olivia, Stuart Nelson, Jiju Antony, and Michael Sony. 2023. “Industry 4.0 Readiness in West of Ireland Small and Medium and Micro Enterprises–an Exploratory Study.” *Quality Management Journal* 30(2):105–20. doi: 10.1080/10686967.2023.2171325.

Méndez-Rivera, Carlos Alberto, Orfa Nidia Patiño-Toro, Alejandro Valencia-Arias, and Diana María Arango-Botero. 2023. “Factors Influencing the Adoption of E-Government Services: A Study among University Students.” *Economies* 11(9). doi: 10.3390/economies11090225.

Mendybayev, B., and P. Burbayeva. 2021. “Digital Transformation: A Case Study of Organizational and Functional Changes of the Public Services Provider.” *SIST 2021 - 2021 IEEE International Conference on Smart Information Systems and Technologies* 1–6. doi: 10.1109/SIST50301.2021.9465972.

Mergel, I., N. Edelmann, and N. Haug. 2019. “Defining Digital Transformation: Results from Expert Interviews.” *Government Information Quarterly* 36(4). doi: 10.1016/j.giq.2019.06.002.

Mittal, P. 2020. “Impact of Digital Capabilities and Technology Skills on Effectiveness of Government in Public Services.” in *2020 International Conference on Data Analytics for Business and Industry: Way Towards a Sustainable Economy, ICDABI 2020*.

Nielsen, M. M., and Z. Jordanoski. 2023. “Digital Transformation, Governance, and Coordination in Times of Crisis: An Analysis of Australia, Denmark, and the Republic of Korea.” *Digital Government: Research and Practice* 4(4). doi: 10.1145/3604569.

Nommik, Steven. 2024. “Cross-Organisational Collaboration Management of Digital Innovation in the Public Sector - The Case of the Estonian Employment Register.” *NISPAcee Journal of Public Administration and Policy* 17(1):142–68. doi: 10.2478/nispa-2024-0007.

O’Neill, R. 2009. “The Transformative Impact of E-Government on Public Governance in New Zealand.” *Public Management Review* 11(6):751–70. doi: 10.1080/14719030903318939.

Padden, Michaela. 2023. “The Transformation of Surveillance in the Digitalisation Discourse of the OECD: A Brief Genealogy.” *Internet Policy Review* 12(3). doi: 10.14763/2023.3.1720.

Pasqualino, Roberto, Melissa Demartini, and Faezeh Bagheri. 2021. “Digital Transformation and Sustainable Oriented Innovation: A System Transition Model for Socio-Economic Scenario Analysis.” *Sustainability (Switzerland)* 13(21). doi: 10.3390/su132111564.

Pittaway, J. J., and A. R. Montazemi. 2020. “Know-How to Lead Digital Transformation: The Case of Local Governments.” *Government Information Quarterly* 37(4). doi: 10.1016/j.giq.2020.101474.

Ponomareva, Karina. 2023. “DIGITAL TRANSFORMATION CHALLENGES TO THE TAX SECURITY OF THE STATE IN RUSSIA AND OTHER BRICS COUNTRIES.” *BRICS Law Journal* 10(4):142–61. doi: 10.21684/2412-2343-2023-10-4-142-161.

Roy, J. 2006. “E-Service Delivery and New Governance Capacities: ‘Service Canada’ as a Case Study.” *International Journal of Services, Technology and Management* 7(3):253–71. doi: 10.1504/IJSTM.2006.010050.

Scupola, A., and I. Mergel. 2022. “Co-Production in Digital Transformation of Public Administration and Public Value Creation: The Case of Denmark.” *Government Information Quarterly* 39(1). doi: 10.1016/j.giq.2021.101650.

Seepma, A. P., C. de Blok, and D. P. Van Donk. 2020. “Designing Digital Public Service Supply Chains: Four Country-Based Cases in Criminal Justice.” *Supply Chain Management* 26(3):418–46. doi: 10.1108/SCM-03-2019-0111.

Shibambu, A., and M. Ngoepe. 2024. “Enhancing Service Delivery through Digital Transformation in the Public Sector in South Africa.” *Global Knowledge, Memory and Communication*. doi: 10.1108/GKMC-12-2023-0476.

Spivakovsky, Oleksandr, Serhii Omelchuk, Daria Malchykova, Alla Tsapiv, and Oleksandr Lemeshchuk. 2023. “Academic Solidarity and Digitization: Management of a Displaced University.” *Problems and Perspectives in Management* 21(2):40–51. doi: 10.21511/ppm.21(2-si).2023.06.

Stare, Janez, Maja Klun, and Mitja Dečman. 2023. “A Case Study on the Development of Digital Competences of Teachers at the University of Ljubljana.” *NISPAcee Journal of Public Administration and Policy* 16(1):138–66. doi: 10.2478/nispa-2023-0006.

Vrabie, Catalin. 2023. “E-Government 3.0: An AI Model to Use for Enhanced Local Democracies.” *Sustainability (Switzerland)* 15(12). doi: 10.3390/su15129572.

Wen, Weiwei, Chenglei Zhang, and Qin Ye. 2024. “Beyond Barriers: Constructing the Cloud Migration Complexity Index for China’s Digital Transformation.” *Journal of Theoretical and Applied Electronic Commerce Research* 19(3):2239–68. doi: 10.3390/jtaer19030109.

Xiao, J., L. Han, and H. Zhang. 2022. “Exploring Driving Factors of Digital Transformation among Local Governments: Foundations for Smart City Construction in China.” *Sustainability (Switzerland)* 14(22). doi: 10.3390/su142214980.

Xu, Y., Y. Men, and L. Yang. 2024. “The Impact of China’s Big Data Pilot Zone Policy on Public Service Quality: A Mixed Methods Study.” *Journal of Asian Public Policy*. doi: 10.1080/17516234.2024.2409235.

Yip, M. H., A. S. C. Santarnaria, and J. Babcock. 2024. “Strengthening Capacity in Industrial Revolution 4.0 (IR 4.0): A Case Study on Training Product-Service Systems Between the US and Vietnam.” in *PICMET 2024 - 2024 Portland International Conference on Management of Engineering and Technology: Technology Management in the Artificial Intelligence Era, Proceedings*.

Zhongyuan, W., S. Y. Woo, and D. Kübler. 2024. “The Emerging Big Data Ecosystem and Digital Transformation of Poverty Governance in China.” *Social Sciences in China* 45(2):152–83. doi: 10.1080/02529203.2024.2367321.

L. Floridi, (2019). Establishing the rules for building trustworthy AI, Nat. Mach. Intell. 1 (6) 261–262.

Fyshchuk, I., & Evsyukova, O. (2020). Effective communication in digital transformation of service state during change management processes in Ukraine. Public Policy and Administration, 19(2), 172–190. <https://doi.org/10.13165/VPA-20-19-2-02>

Demchenko, M. V., Gulieva, M. E., Larina, T. V., & Simaeva, E. P. (2021). Digital Transformation of Legal Education: Problems, Risks and Prospects. European Journal of Contemporary Education, 10(2), 297–307. <https://doi.org/10.13187/ejced.2021.2.297>

Criado, J. I., & Guevara-Gómez, A. (2021). Public sector, open innovation, and collaborative governance in lockdown times. Research of Spanish cases during the COVID-19 crisis. Transforming Government: People, Process and Policy, 15(4), 612–626. <https://doi.org/10.1108/TG-08-2020-0242>

Bhaskara, S., & Bawa, K. S. (2021). Societal digital platforms for sustainability: Agriculture. Sustainability (Switzerland), 13(9), 1–8. <https://doi.org/10.3390/su13095048>

Alharbi, A. S. (2019). Assessment of organizational digital transformation in Saudi Arabia. Proceedings of the 2019 6th International Conference on Computing for Sustainable Global Development, INDIACom, 1292–1297.

Ali, M. M. (2020). Digitization of the emerging economy: An exploratory and explanatory case study. Journal of Governance and Regulation, 9(4), 25–36. <https://doi.org/10.22495/jgrv9i4art2>

Chi, H. R., Wu, C. K., Huang, N. F., Tsang, K. F., & Radwan, A. (2023). A survey of network automation for industrial internet-of-things toward Industry 5.0. IEEE Transactions on Industrial Informatics, 19(2), 2065–2077. <https://doi.org/10.1109/> tii.2022.3215231

Chen, M., & Grossklags, J. (2022). Social Control in the Digital Transformation of Society: A Case Study of the Chinese Social Credit System. Social Sciences, 11(6). <https://doi.org/10.3390/socsci11060229>

Aoun, A., Ilinca, A., Ghandour, M., & Ibrahim, H. (2021). A review of industry 4.0 characteristics and challenges, with potential improvements using blockchain technology. Computers & Industrial Engineering, 162, Article 107746. <https://doi.org/10.1016/j.cie.2021.107746>

Nafizah, U. Y., Roper, S., & Mole, K. (2024). Estimating the innovation benefits of first mover and second-mover strategies when micro-businesses adopt artificial intelligence and machine learning. Small Business Economics, 62(1), 411–434. <https://doi.org/10.1007/s11187-023-00779-x>

Wang, H., Ning, H. S., Lin, Y. J., Wang, W. X., Dhelim, S., Farha, F., Ding, J. G., & Daneshmand, M. (2023). A survey on the metaverse: The state-of-the-art, technologies, applications, and challenges. *IEEE Internet of Things Journal, 10*(16), 14671–14688. <https://doi.org/10.1109/jiot.2023.3278329>

Skare, M., de Obesso, M. D., & Ribeiro-Navarrete, S. (2023). Digital transformation and European small and medium enterprises (SMEs): A comparative study using digital economy and society index data. International Journal of Information Management, 68, Article 102594. <https://doi.org/10.1016/j.ijinfomgt.2022.102594>

N.A. Panayiotou, V.P. Stavrou, (2021). Government to business e-services – A systematic literature review, Government Inf. Quarterly 38 (2) 101576. <https://doi.org/10.1016/j.giq.2021.101576>

Lappi, T.M., Aaltonen, K., & Kujala, J. (2019). Project governance and portfolio management in government digitalization. Transforming Government: People, Process and Policy, 13(2), 159–196. https://doi:10.1108/TG-11-2018-0068

ITU, (2020). Digital Skills Insights. International Telecommunication Union, <https://academy.itu.int/main-activities/research-publications/digital-skills-insights/digital-skills-insights>.

J. Magnusson, T. P¨aiv¨arinta, D. Koutsikouri (2020). Digital ambidexterity in the public sector: empirical evidence of a bias in balancing practices, Transforming Government: People, Process and Policy 15 (1) 59–79, https://doi.org/ 10.1108/TG-02-2020-0028.

P. Dunleavy, H. Margetts, S. Bastow, J. Tinkler, (2006). New public management is dead - Long live digital-era governance, Journal of Public Administration Research and Theory 16 (3) 467–494, <https://doi.org/10.1093/jopart/mui057>.

J.Y. Hur, W. Cho, G. Lee, S.H. Bickerton, (2019). The “Smart Work” myth: how bureaucratic inertia and workplace culture stymied digital transformation in the relocation of South Korea’s Capital, Asian Studies Review 43 (4) 691–709, <https://doi.org/10.1080/10357823.2019.1663786>.

FRWO, (2021). Introduction of the electronic service-rendering platform. <http://www.frw.ir/02/Fa/>

P. Dootson, M. Tate, K.C. Desouza, P. Townson (2021). Transforming public records management: six key insights, J. Associat. Inf. Sci. Technol. 72 (5) 643–648, <https://doi.org/10.1002/asi.24429>.
